# Supplementary material for: New asymmetric tetradentate phenanthroline chelators with pyrazole and amide groups for complexation and solvent extraction of Ln(iii)/Am(iii)
Source: Royal Society of Chemistry journal article supplement (doi:10.1039/d3dt03194b), 2023-11-27
Supplement: d3dt03194b1.pdf [file d3dt03194b1.pdf]

## Supporting Information

# New asymmetric tetradentate phenanthroline chelators with pyrazol and amide groups for complexation and solvent extraction of Ln(III)/Am(III)

*Haolong Wang<sup>a</sup>, Pengyuan Gao<sup>a</sup>, Tengfei Cui<sup>a</sup>, Dongqi Wang<sup>b</sup>, Jinping Liu<sup>c</sup>, Hui He<sup>c</sup>, Zongyuan Chen<sup>a</sup>, Qiang Jin<sup>a</sup>, Zhijun Guo<sup>a,\*</sup>*

*<sup>a</sup> Frontier Science Center for Rare Isotopes; School of Nuclear Science and Technology,  
Lanzhou university, Lanzhou 730000, China*

*<sup>b</sup> State Key Laboratory of Fine Chemicals, Liaoning Key Laboratory for Catalytic Conversion  
of Carbon Resources, School of Chemical Engineering, Dalian University of Technology,  
Dalian 116024, China*

*<sup>c</sup> Radiochemistry Department, China Institute of Atomic Energy, Beijing 102413, China*

*\*Corresponding author. Tel.: +86 931 8913278; fax: +86 931 8913551*

*E-mail address: [guozhj@lzu.edu.cn](mailto:guozhj@lzu.edu.cn) (Z. Guo)*

# Contents

|                                                                                         |    |
|-----------------------------------------------------------------------------------------|----|
| 1. Structures of the relevant ligands .....                                             | 3  |
| 2. NMR and HRMS data of the ligands.....                                                | 4  |
| 3. Solvent extraction experiments.....                                                  | 7  |
| Extraction kinetic .....                                                                | 7  |
| Influence of HNO <sub>3</sub> concentration on SF <sub>Am/Eu</sub> .....                | 7  |
| Dissolution of the ligands in the aqueous phase.....                                    | 8  |
| Influence of ligand concentration .....                                                 | 10 |
| 4. Two-dimensional NMR spectra of L2 .....                                              | 11 |
| 5. UV-vis spectrophotometric titration .....                                            | 12 |
| 6. Crystal Data and structure refinement of Eu(L1)(NO <sub>3</sub> ) <sub>3</sub> ..... | 13 |
| 7. DFT optimized structures .....                                                       | 17 |

# 1. Structures of the relevant ligands

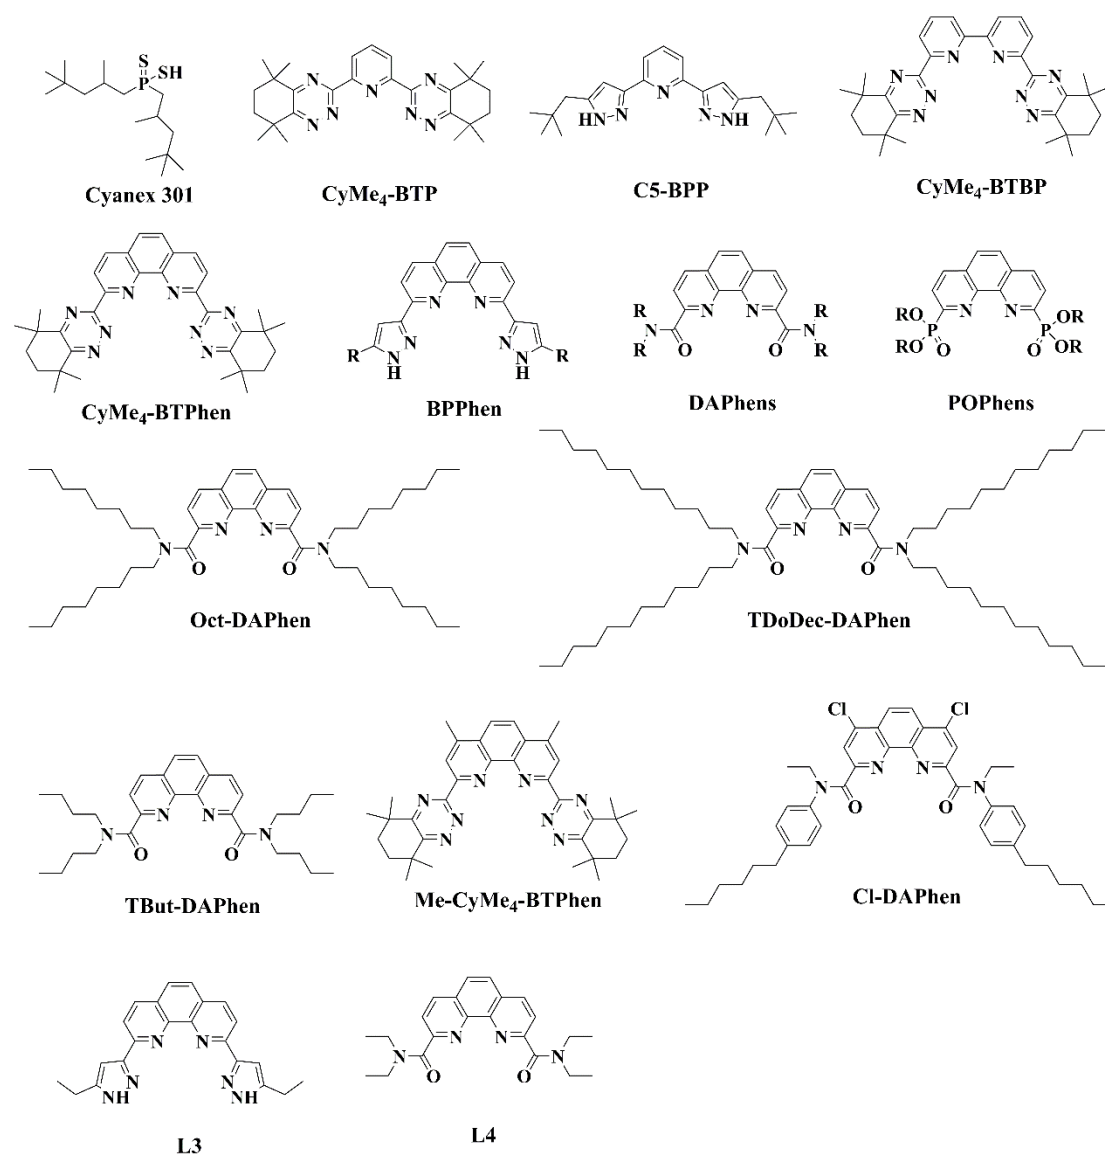

**Fig. S1** Structures of the relevant ligands.

## 2. NMR and HRMS data of the ligands

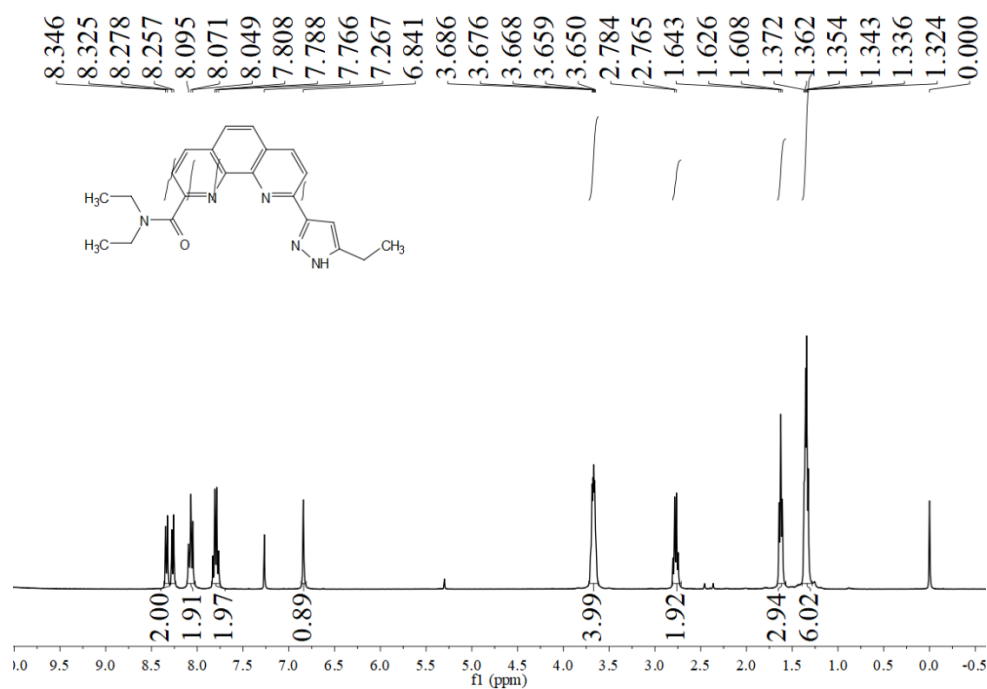

Fig. S2  $^1\text{H}$  NMR spectrum of L1 in  $\text{CDCl}_3$ .

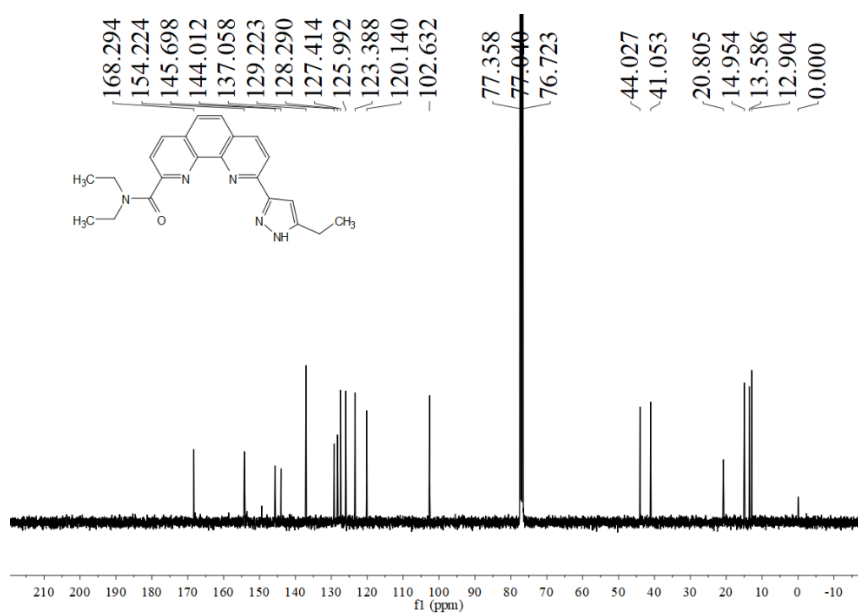

Fig. S3  $^{13}\text{C}$  NMR spectrum of L1 in  $\text{CDCl}_3$ .

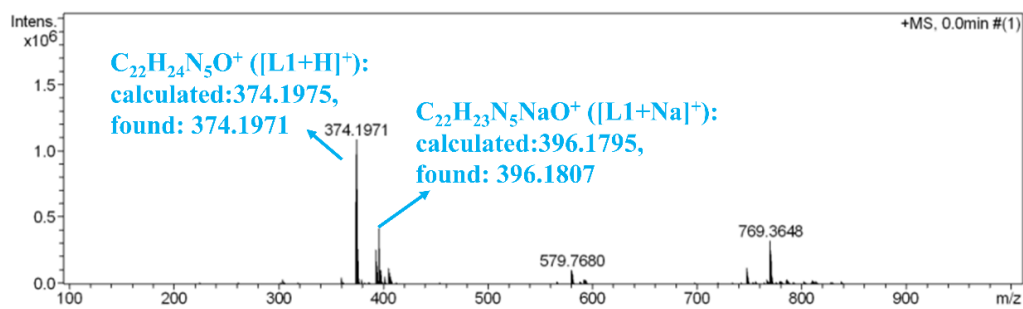

Fig. S4 HRMS (ESI) of L1.

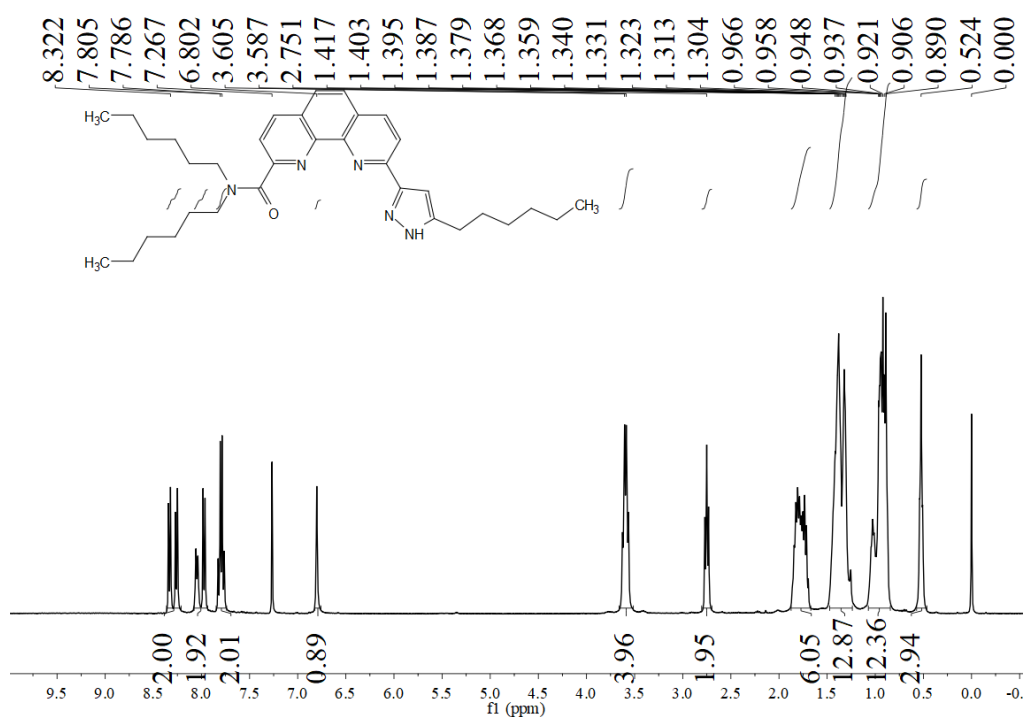

Fig. S5 <sup>1</sup>H NMR spectrum of L2 in CDCl<sub>3</sub>.

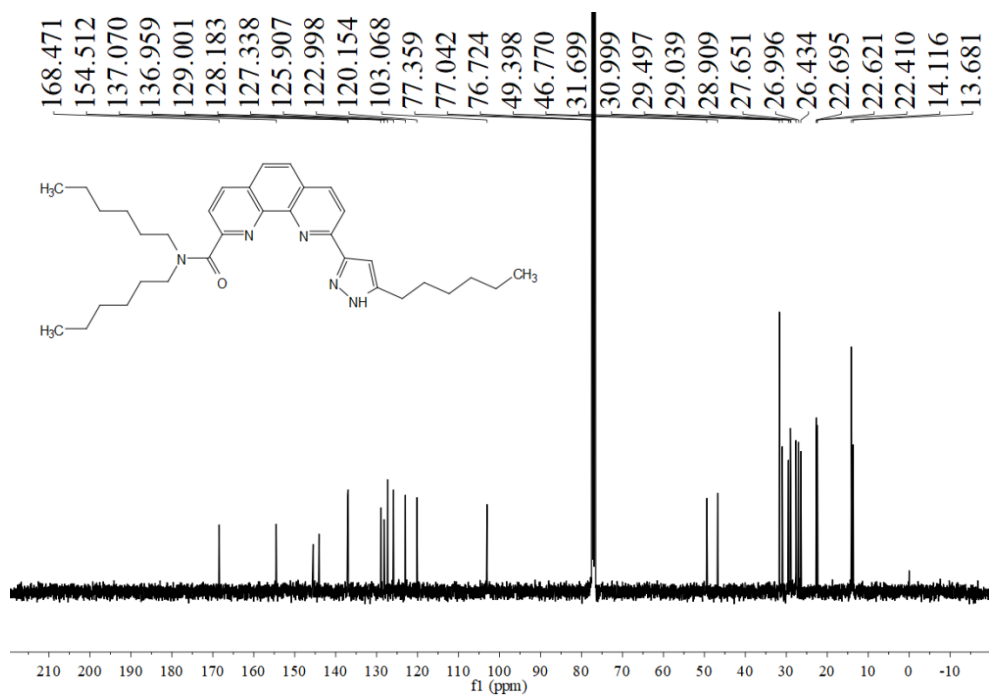

**Fig. S6** <sup>13</sup>C NMR spectrum of L2 in CDCl<sub>3</sub>.

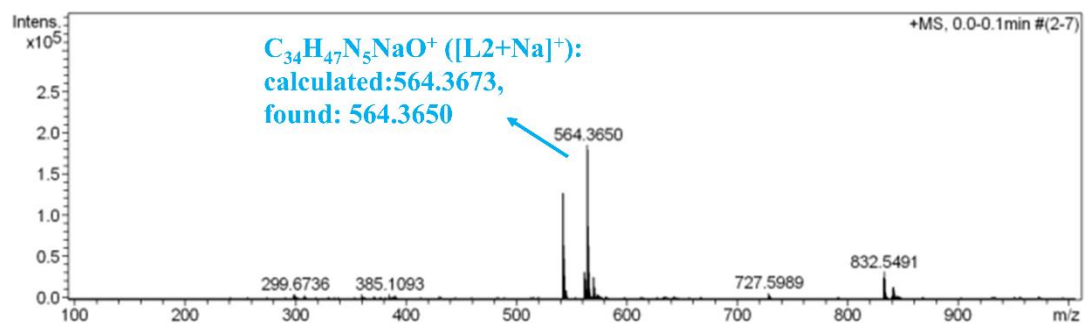

**Fig. S7** HRMS (ESI) of L2.

### 3. Solvent extraction experiments

#### Extraction kinetic

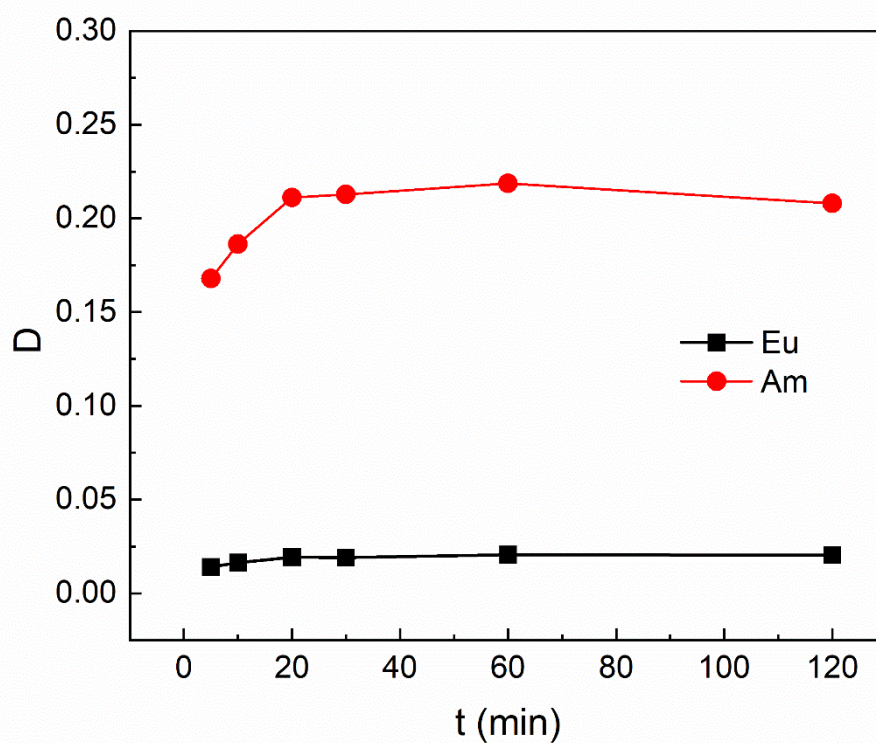

**Fig. S8** Influence of contact time on the extraction of  $\text{Am}^{3+}$  and  $\text{Eu}^{3+}$ . Organic phase: 0.01 mol/L L2 in 1,2-dichloroethane; Aqueous phase:  $1 \times 10^{-4}$  mol/L  $\text{Eu}(\text{NO}_3)_3$  and trace amount of  $^{241}\text{Am}/^{152,154}\text{Eu}$  in 3.0 mol/L  $\text{HNO}_3$  solution;  $T=298$  K.

#### Influence of $\text{HNO}_3$ concentration on $\text{SF}_{\text{Am/Eu}}$

**Table S1** Influence of  $\text{HNO}_3$  concentration on  $\text{SF}_{\text{Am/Eu}}$  in 1,2-dichloroethane.

| $\text{HNO}_3$ , mol/L | L1             | L2             |
|------------------------|----------------|----------------|
| 0.01                   | $1.9 \pm 1.7$  | $1.6 \pm 0.8$  |
| 0.1                    | $1.0 \pm 0.4$  | $45.8 \pm 5.3$ |
| 1                      | $15.6 \pm 1.5$ | $34.5 \pm 2.7$ |

|   |         |          |
|---|---------|----------|
| 3 | 6.4±1.3 | 14.2±1.2 |
| 5 | 1.1±0.7 | 12.3±1.1 |

**Table S2** SF<sub>Am/Eu</sub> of relevant ligands.

| Ligands       | SF <sub>Am/Eu</sub> | C (HNO <sub>3</sub> ) mol/L | Solvent                 | Lipophilic anion source | References |
|---------------|---------------------|-----------------------------|-------------------------|-------------------------|------------|
| L2            | 34.5±2.7            | 1.0                         | 1,2-Dichloroethane      | No                      | This work  |
| BPPhen        | ~100                | 1.0                         | 3-Nitrobenzotrifluoride | 2-bromohexanoic acid    | 1          |
| Et-Tol-DAPhen | 67                  | 1.0                         | Cyclohexanone           | No                      | 2          |
| Pyr-DAPhen    | ~6                  | 1.0                         | 3-Nitrobenzotrifluoride | No                      | 3          |
| Oct-DAPhen    | 6.5±1.5             | 3.0                         | 1,2-Dichloroethane      | No                      | 4          |
| TButDAPhen    | 8.9                 | 3;2                         | 3-Nitrobenzotrifluoride | No                      | 5, 6       |
| TDoDecDAPhen  | 10                  | 3                           | 3-Nitrobenzotrifluoride | No                      | 7          |
| TDoDecDAPhen  | 6.5                 | 3                           | Dodecane                | No                      | 7          |

### Dissolution of the ligands in the aqueous phase

The dissolution of L1 and L2 was evaluated by contacting L1 and L2 solutions of 1,2-dichloroethane (0.01 mol/L) with the aqueous HCl solutions of different concentrations, respectively. HCl was used instead of HNO<sub>3</sub> owing to the interference of HNO<sub>3</sub> to the absorbance of the ligands at 297 nm. Equal volumes (1.0 mL) of the organic and aqueous phases were stirred in a 3.0 mL vial at 25 °C for 2 h. After phase separation by centrifugation, the concentrations of the ligands in the organic phase were determined directly by the absorbance at 297 nm.



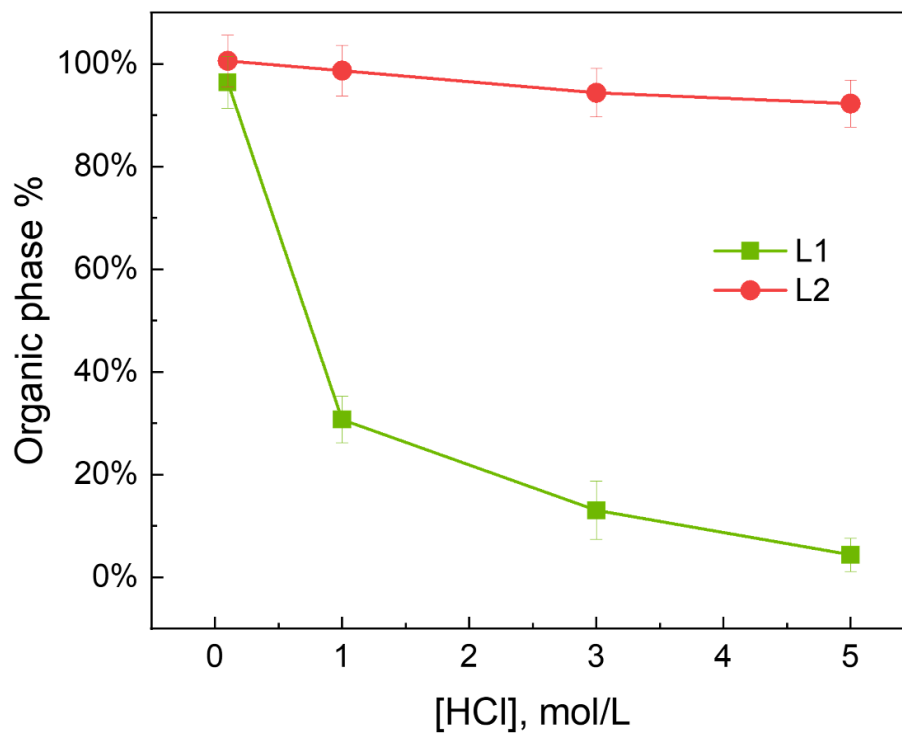

**Figure S9.** The relative concentration ( $C/C_0 \times 100\%$ ) of the ligands in the organic phase.

$V/V = 1:1$ ,  $C_0 = 0.01$  mol/L.

## Influence of ligand concentration

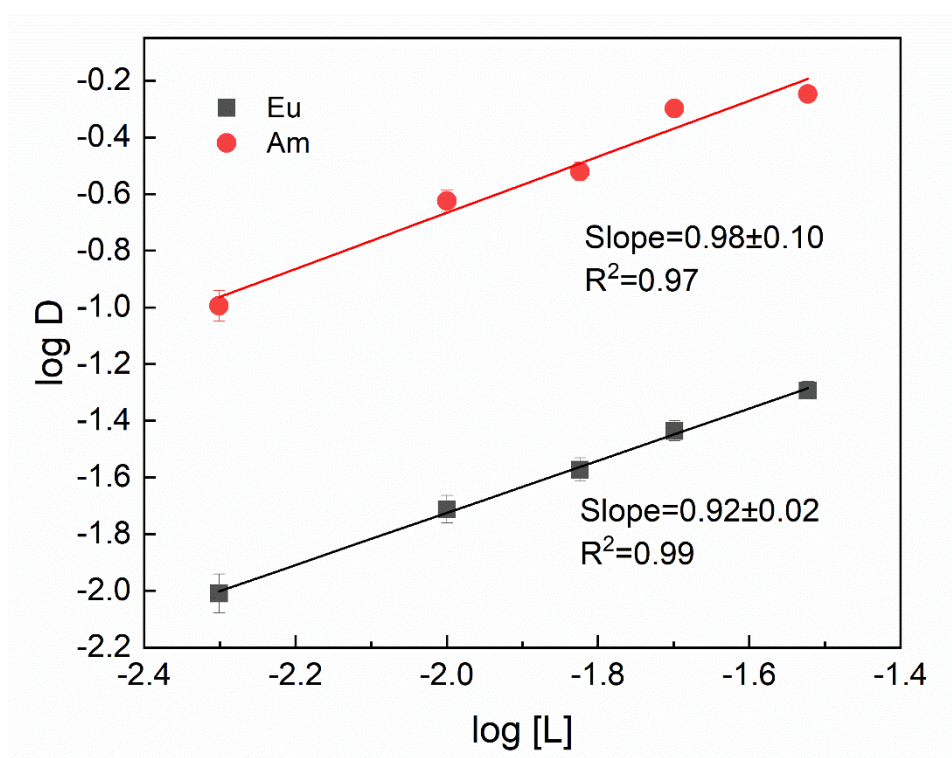

**Figure S10.** The influence of ligand concentration on the extraction of  $\text{Am}^{3+}$  and  $\text{Eu}^{3+}$ . Organic phase: different concentrations of L2 in 1,2-dichloroethane; Aqueous phase:  $1 \times 10^{-4}$  mol/L  $\text{Eu}(\text{NO}_3)_3$  and trace amount of  $^{241}\text{Am} / ^{152,154}\text{Eu}$  in 3.0 mol/L  $\text{HNO}_3$  solution;  $T=298$  K.

#### 4. Two-dimensional NMR spectra of L2

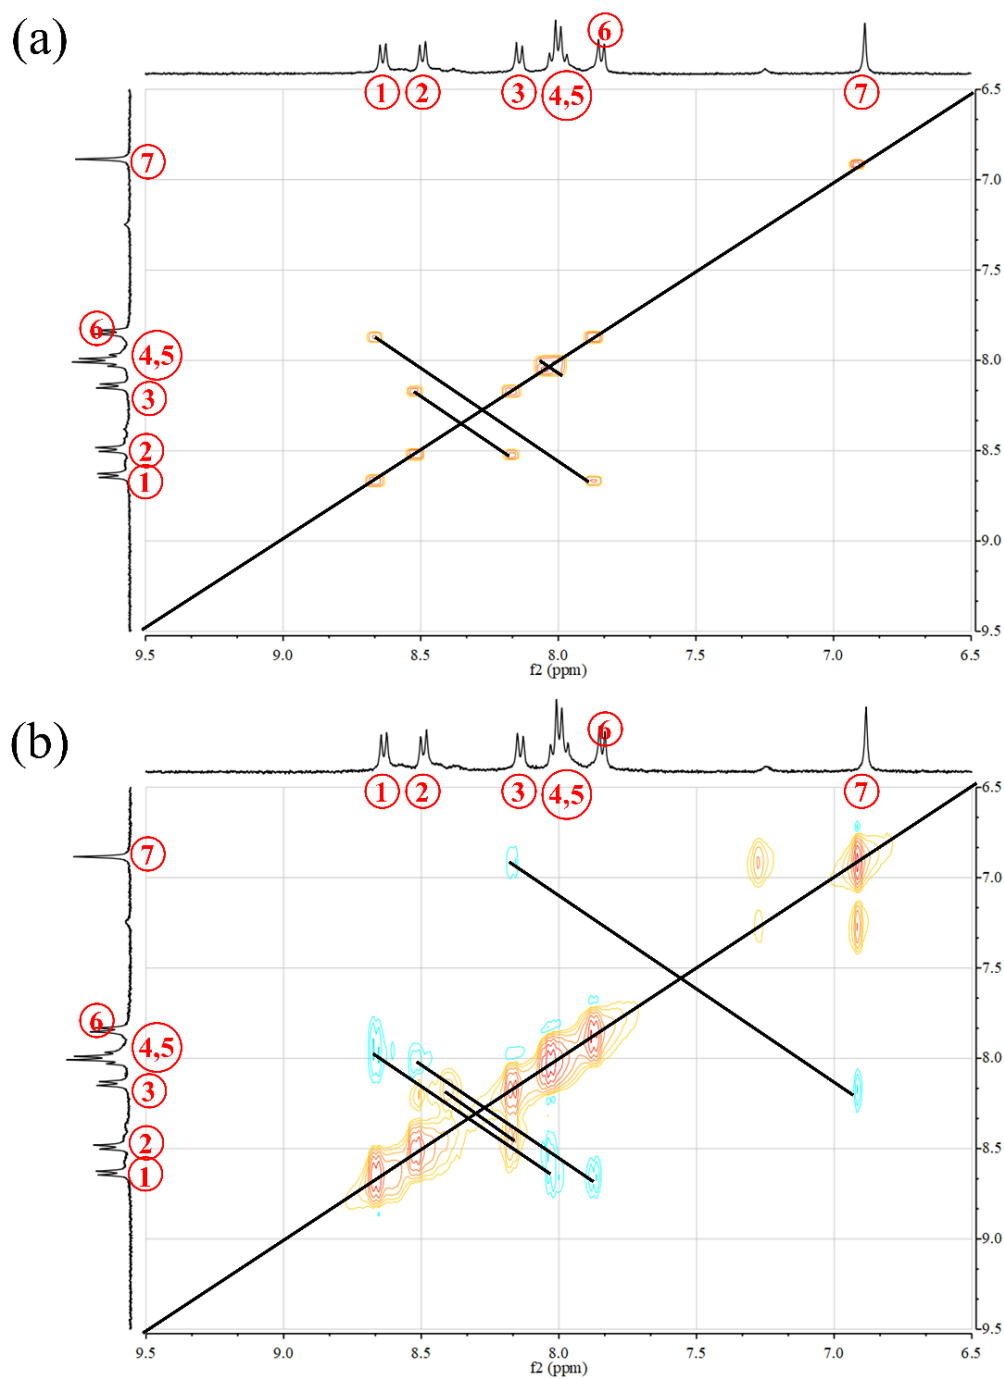

**Fig. S11** The  $^1\text{H}$ - $^1\text{H}$  COSY and NOESY of L2 in  $\text{CD}_3\text{OD}$ : (a)  $^1\text{H}$ - $^1\text{H}$  COSY; (b)  $^1\text{H}$ - $^1\text{H}$  NOESY.

## 5. UV-vis spectrophotometric titration

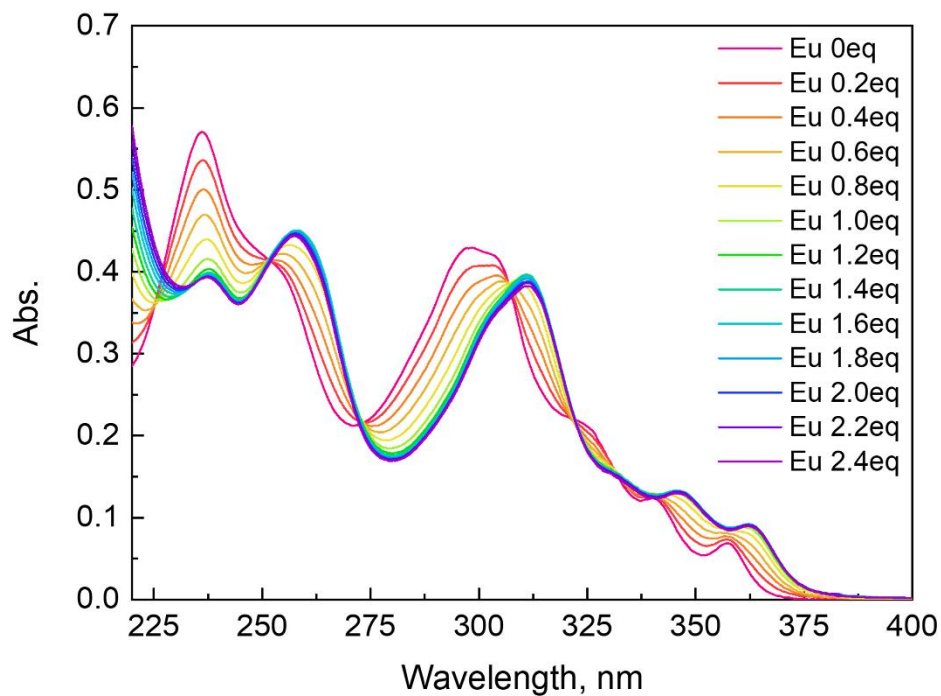

**Fig. S12** UV-vis spectrophotometric titration of L1 with Eu<sup>3+</sup> in methanol at 298 K.

## 6. Crystal Data and structure refinement of Eu(L1)(NO<sub>3</sub>)<sub>3</sub>

**Table S3** Crystal Data and structure refinement of Eu(L1)(NO<sub>3</sub>)<sub>3</sub>.

|                                             | [Eu(L1)(NO <sub>3</sub> ) <sub>3</sub> ]                         |
|---------------------------------------------|------------------------------------------------------------------|
| CCDC No.                                    | 2130928                                                          |
| Empirical formula                           | C <sub>22</sub> H <sub>22</sub> EuN <sub>8</sub> O <sub>10</sub> |
| Formula weight                              | 710.43                                                           |
| Temperature/K                               | 301.74(10)                                                       |
| Crystal system                              | monoclinic                                                       |
| Space group                                 | P21/n                                                            |
| a/Å                                         | 9.1272(3)                                                        |
| b/Å                                         | 14.1154(4)                                                       |
| c/Å                                         | 20.6307(7)                                                       |
| α/°                                         | 90                                                               |
| β/°                                         | 95.093(3)                                                        |
| γ/°                                         | 90                                                               |
| Volume/Å <sup>3</sup>                       | 2647.44(14)                                                      |
| Z                                           | 4                                                                |
| ρ <sub>calc</sub> /cm <sup>3</sup>          | 1.782                                                            |
| μ/mm <sup>-1</sup>                          | 2.44                                                             |
| F(000)                                      | 1412                                                             |
| Crystal size/mm <sup>3</sup>                | 0.12 × 0.08 × 0.07                                               |
| Radiation                                   | MoKα (λ = 0.71073)                                               |
| 2θ range for data collection/°              | 3.5 to 61.874                                                    |
| Index ranges                                | -12 ≤ h ≤ 11, -19 ≤ k ≤ 16, -25 ≤ l ≤ 25                         |
| Reflections collected                       | 19329                                                            |
| Independent reflections                     | 6680 [R <sub>int</sub> = 0.0335, R <sub>sigma</sub> = 0.0373]    |
| Data/restraints/parameters                  | 6680/0/373                                                       |
| Goodness-of-fit on F <sup>2</sup>           | 1.018                                                            |
| Final R indexes [I >= 2σ (I)]               | R <sub>1</sub> = 0.0282, wR <sub>2</sub> = 0.0652                |
| Final R indexes [all data]                  | R <sub>1</sub> = 0.0409, wR <sub>2</sub> = 0.0708                |
| Largest diff. peak/hole / e Å <sup>-3</sup> | 0.88/-0.56                                                       |

**Table S4** Bond lengths of Eu(L1)(NO<sub>3</sub>)<sub>3</sub>.

| Atom | Atom | Length/Å | Atom | Atom | Length/Å |
|------|------|----------|------|------|----------|
| Eu1  | O1   | 2.390(2) | N5   | C14  | 1.325(4) |
| Eu1  | O3   | 2.637(2) | N5   | C17  | 1.482(4) |
| Eu1  | O4   | 2.485(2) | N6   | N8   | 1.347(4) |
| Eu1  | O5   | 2.481(2) | N6   | C18  | 1.355(4) |
| Eu1  | O6   | 2.481(2) | N8   | C4   | 1.336(3) |
| Eu1  | O8   | 2.499(2) | C1   | C14  | 1.520(4) |
| Eu1  | O10  | 2.518(2) | C1   | C16  | 1.397(4) |
| Eu1  | N1   | 2.643(2) | C2   | C19  | 1.509(5) |
| Eu1  | N4   | 2.572(2) | C3   | C7   | 1.366(5) |
| Eu1  | N8   | 2.546(3) | C3   | C20  | 1.402(5) |
| O1   | C14  | 1.250(4) | C4   | C6   | 1.461(4) |
| O2   | N3   | 1.214(3) | C4   | C10  | 1.397(4) |
| O3   | N3   | 1.244(4) | C5   | C17  | 1.503(6) |
| O4   | N2   | 1.260(4) | C6   | C7   | 1.404(4) |
| O5   | N3   | 1.272(3) | C8   | C12  | 1.444(4) |
| O6   | N2   | 1.262(4) | C8   | C20  | 1.407(4) |
| O7   | N7   | 1.220(4) | C9   | C18  | 1.485(5) |
| O8   | N7   | 1.254(3) | C9   | C21  | 1.531(7) |
| O9   | N2   | 1.209(4) | C10  | C18  | 1.386(5) |
| O10  | N7   | 1.270(4) | C11  | C16  | 1.370(4) |
| N1   | C6   | 1.332(4) | C11  | C22  | 1.400(5) |
| N1   | C8   | 1.349(4) | C12  | C22  | 1.402(4) |
| N4   | C1   | 1.326(4) | C13  | C15  | 1.344(5) |
| N4   | C12  | 1.352(3) | C13  | C22  | 1.442(4) |
| N5   | C2   | 1.476(4) | C15  | C20  | 1.426(4) |

**Table S5** Bond angles of compound Eu(L1)(NO<sub>3</sub>)<sub>3</sub>.

| Atom | Atom | Atom | Angle/°   | Atom | Atom | Atom | Angle/°    |
|------|------|------|-----------|------|------|------|------------|
| O1   | Eu1  | O3   | 71.85(7)  | N7   | O10  | Eu1  | 95.62(17)  |
| O1   | Eu1  | O4   | 76.69(8)  | C6   | N1   | Eu1  | 121.47(19) |
| O1   | Eu1  | O5   | 121.05(7) | C6   | N1   | C8   | 118.1(2)   |
| O1   | Eu1  | O6   | 80.81(8)  | C8   | N1   | Eu1  | 120.38(18) |
| O1   | Eu1  | O8   | 73.15(7)  | O4   | N2   | Eu1  | 58.18(15)  |
| O1   | Eu1  | O10  | 118.37(8) | O4   | N2   | O6   | 115.9(3)   |
| O1   | Eu1  | N1   | 120.01(7) | O6   | N2   | Eu1  | 58.01(15)  |
| O1   | Eu1  | N2   | 76.06(8)  | O9   | N2   | Eu1  | 174.2(3)   |
| O1   | Eu1  | N4   | 62.53(7)  | O9   | N2   | O4   | 121.6(3)   |
| O1   | Eu1  | N7   | 95.52(8)  | O9   | N2   | O6   | 122.5(3)   |
| O1   | Eu1  | N8   | 155.07(8) | O2   | N3   | Eu1  | 173.4(3)   |
| O3   | Eu1  | N1   | 167.66(8) | O2   | N3   | O3   | 123.0(3)   |
| O3   | Eu1  | N2   | 91.32(8)  | O2   | N3   | O5   | 120.9(3)   |
| O3   | Eu1  | N7   | 86.66(8)  | O3   | N3   | Eu1  | 61.64(15)  |
| O4   | Eu1  | O3   | 115.06(8) | O3   | N3   | O5   | 116.1(3)   |
| O4   | Eu1  | O8   | 146.22(8) | O5   | N3   | Eu1  | 54.65(14)  |
| O4   | Eu1  | O10  | 140.69(8) | C1   | N4   | Eu1  | 118.32(18) |
| O4   | Eu1  | N1   | 73.22(8)  | C1   | N4   | C12  | 118.8(3)   |
| O4   | Eu1  | N2   | 25.53(8)  | C12  | N4   | Eu1  | 122.84(19) |
| O4   | Eu1  | N4   | 79.70(7)  | C2   | N5   | C17  | 115.2(3)   |
| O4   | Eu1  | N7   | 152.25(8) | C14  | N5   | C2   | 126.8(3)   |
| O4   | Eu1  | N8   | 80.54(9)  | C14  | N5   | C17  | 117.2(3)   |
| O5   | Eu1  | O3   | 49.20(7)  | N8   | N6   | C18  | 112.6(2)   |
| O5   | Eu1  | O4   | 124.21(8) | O7   | N7   | Eu1  | 178.6(3)   |
| O5   | Eu1  | O6   | 78.24(8)  | O7   | N7   | O8   | 120.9(3)   |
| O5   | Eu1  | O8   | 85.03(9)  | O7   | N7   | O10  | 122.4(3)   |
| O5   | Eu1  | O10  | 81.18(9)  | O8   | N7   | Eu1  | 57.89(15)  |
| O5   | Eu1  | N1   | 118.85(7) | O8   | N7   | O10  | 116.7(3)   |
| O5   | Eu1  | N2   | 102.08(9) | O10  | N7   | Eu1  | 58.82(15)  |
| O5   | Eu1  | N4   | 155.97(8) | N6   | N8   | Eu1  | 128.46(18) |
| O5   | Eu1  | N7   | 82.79(9)  | C4   | N8   | Eu1  | 123.5(2)   |
| O5   | Eu1  | N8   | 65.16(8)  | C4   | N8   | N6   | 105.0(2)   |
| O6   | Eu1  | O3   | 68.69(8)  | N4   | C1   | C14  | 111.4(3)   |
| O6   | Eu1  | O4   | 50.99(7)  | N4   | C1   | C16  | 121.9(3)   |
| O6   | Eu1  | O8   | 135.49(8) | C16  | C1   | C14  | 126.2(3)   |
| O6   | Eu1  | O10  | 157.36(9) | N5   | C2   | C19  | 113.9(3)   |
| O6   | Eu1  | N1   | 114.69(8) | C7   | C3   | C20  | 120.1(3)   |
| O6   | Eu1  | N2   | 25.55(8)  | N8   | C4   | C6   | 117.0(3)   |
| O6   | Eu1  | N4   | 124.59(8) | N8   | C4   | C10  | 111.1(3)   |
| O6   | Eu1  | N7   | 155.06(8) | C10  | C4   | C6   | 131.6(3)   |
| O6   | Eu1  | N8   | 77.01(9)  | N1   | C6   | C4   | 115.1(2)   |

---

|     |     |     |            |     |     |     |           |
|-----|-----|-----|------------|-----|-----|-----|-----------|
| O8  | Eu1 | O3  | 69.15(8)   | N1  | C6  | C7  | 122.2(3)  |
| O8  | Eu1 | O10 | 50.71(7)   | C7  | C6  | C4  | 122.6(3)  |
| O8  | Eu1 | N1  | 109.55(7)  | C3  | C7  | C6  | 119.4(3)  |
| O8  | Eu1 | N2  | 147.39(8)  | N1  | C8  | C12 | 117.1(2)  |
| O8  | Eu1 | N4  | 73.17(8)   | N1  | C8  | C20 | 123.7(3)  |
| O8  | Eu1 | N7  | 25.15(7)   | C20 | C8  | C12 | 119.1(3)  |
| O8  | Eu1 | N8  | 131.39(8)  | C18 | C9  | C21 | 109.4(4)  |
| O10 | Eu1 | O3  | 104.25(8)  | C18 | C10 | C4  | 105.4(3)  |
| O10 | Eu1 | N1  | 67.89(8)   | C16 | C11 | C22 | 119.7(3)  |
| O10 | Eu1 | N2  | 161.28(8)  | N4  | C12 | C8  | 117.3(3)  |
| O10 | Eu1 | N4  | 77.25(8)   | N4  | C12 | C22 | 123.0(3)  |
| O10 | Eu1 | N7  | 25.56(7)   | C22 | C12 | C8  | 119.5(3)  |
| O10 | Eu1 | N8  | 85.88(9)   | C15 | C13 | C22 | 120.7(3)  |
| N1  | Eu1 | N2  | 94.93(8)   | O1  | C14 | Eu1 | 39.55(13) |
| N1  | Eu1 | N7  | 88.62(8)   | O1  | C14 | N5  | 121.6(3)  |
| N2  | Eu1 | N7  | 171.54(9)  | O1  | C14 | C1  | 115.6(2)  |
| N4  | Eu1 | O3  | 127.14(8)  | N5  | C14 | Eu1 | 146.4(2)  |
| N4  | Eu1 | N1  | 61.82(7)   | N5  | C14 | C1  | 122.7(3)  |
| N4  | Eu1 | N2  | 101.75(8)  | C1  | C14 | Eu1 | 83.80(16) |
| N4  | Eu1 | N7  | 73.18(8)   | C13 | C15 | C20 | 121.2(3)  |
| N8  | Eu1 | O3  | 109.69(8)  | C11 | C16 | C1  | 119.6(3)  |
| N8  | Eu1 | N1  | 61.35(8)   | N5  | C17 | C5  | 112.8(3)  |
| N8  | Eu1 | N2  | 79.02(9)   | N6  | C18 | C9  | 121.6(3)  |
| N8  | Eu1 | N4  | 123.00(8)  | N6  | C18 | C10 | 105.8(3)  |
| N8  | Eu1 | N7  | 109.39(9)  | C10 | C18 | C9  | 132.3(3)  |
| C14 | O1  | Eu1 | 121.00(18) | C3  | C20 | C8  | 116.5(3)  |
| N3  | O3  | Eu1 | 93.83(16)  | C3  | C20 | C15 | 123.6(3)  |
| N2  | O4  | Eu1 | 96.29(18)  | C8  | C20 | C15 | 119.9(3)  |
| N3  | O5  | Eu1 | 100.63(18) | C11 | C22 | C12 | 116.9(3)  |
| N2  | O6  | Eu1 | 96.44(18)  | C11 | C22 | C13 | 123.5(3)  |
| N7  | O8  | Eu1 | 96.95(17)  | C12 | C22 | C13 | 119.5(3)  |

---



## 7. DFT optimized structures

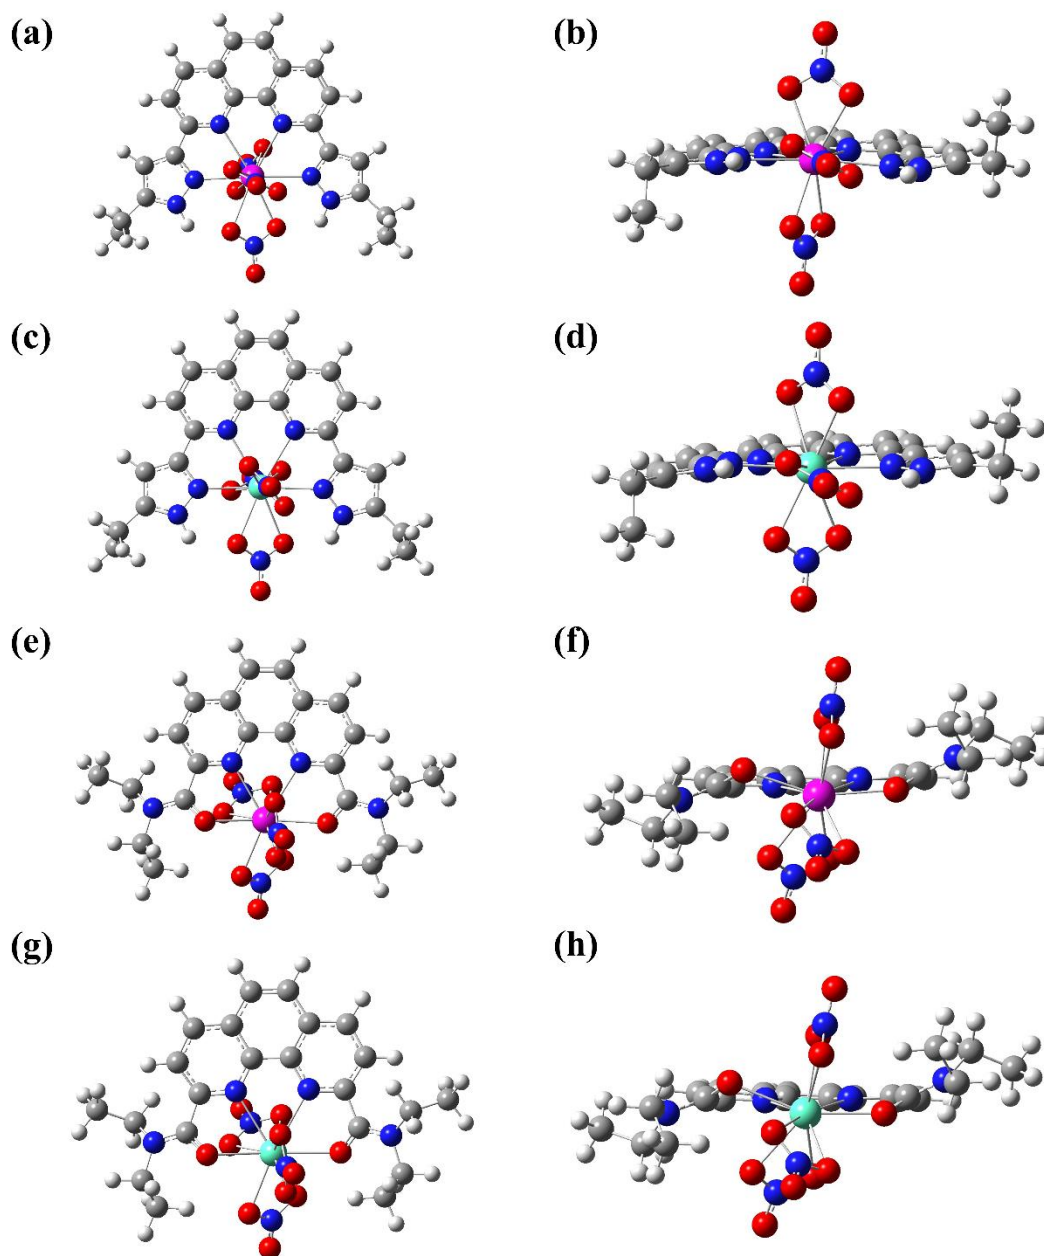

**Fig. S13** DFT optimized structures of Am/Eu complexes: (a) Am(L3)(NO<sub>3</sub>)<sub>3</sub> top view, (b) Am(L3)(NO<sub>3</sub>)<sub>3</sub> side view, (c) Eu(L3)(NO<sub>3</sub>)<sub>3</sub> top view, (d) Eu(L3)(NO<sub>3</sub>)<sub>3</sub> side view, (e) Am(L4)(NO<sub>3</sub>)<sub>3</sub> top view, (f) Am(L4)(NO<sub>3</sub>)<sub>3</sub> side view, (g) Eu(L4)(NO<sub>3</sub>)<sub>3</sub> top view, (h) Eu(L4)(NO<sub>3</sub>)<sub>3</sub> side view. Am: purple, Eu: cyan, C: gray, H: gray white, N: blue, O: red.

## References

- 1 Y. Liu, X. Yang, S. Ding, Z. Wang, L. Zhang, L. Song, Z. Chen and X. Wang, Highly Efficient Trivalent Americium/Europium Separation by Phenanthroline-Derived Bis(pyrazole) Ligands, *Inorg. Chem.*, 2018, **57**, 5782-5790.
- 2 C.-L. Xiao, C.-Z. Wang, L.-Y. Yuan, B. Li, H. He, S. Wang, Y.-L. Zhao, Z.-F. Chai and W.-Q. Shi, Excellent Selectivity for Actinides with a Tetradentate 2,9-Diamide-1,10-Phenanthroline Ligand in Highly Acidic Solution: A Hard–Soft Donor Combined Strategy, *Inorg. Chem.*, 2014, **53**, 1712-1720.
- 3 R. Meng, L. Xu, X. Yang, M. Sun, C. Xu, N. E. Borisova, X. Zhang, L. Lei and C. Xiao, Influence of a N-Heterocyclic Core on the Binding Capability of N,O-Hybrid Diamide Ligands toward Trivalent Lanthanides and Actinides, *Inorg. Chem.*, 2021, **60**, 8754-8764.
- 4 S. Jansone-Popova, A. S. Ivanov, V. S. Bryantsev, F. V. Sloop, R. Custelcean, I. Popovs, M. M. Dekarske and B. A. Moyer, Bis-lactam-1,10-phenanthroline (BLPhen), a New Type of Preorganized Mixed N,O-Donor Ligand That Separates Am(III) over Eu(III) with Exceptionally High Efficiency, *Inorg. Chem.*, 2017, **56**, 5911-5917.
- 5 M. Alyapyshev, J. Ashina, D. Dar'in, E. Kenf, D. Kirsanov, L. Tkachenko, A. Legin, G. Starova and V. Babain, 1,10-Phenanthroline-2,9-dicarboxamides as Ligands for Separation and Sensing of Hazardous Metals, *RSC Advances*, 2016, **6**, 68642-68652.
- 6 M. Alyapyshev, V. Babain, L. Tkachenko, E. Kenf, I. Voronaev, D. Dar'in, P. Matveev, V. Petrov, S. Kalmykov and Y. Ustynyuk, Extraction of actinides with heterocyclic dicarboxamides, *J. Radioanal. Nucl. Chem.*, 2018, **316**, 419-428.
- 7 N. Tsutsui, Y. Ban, H. Suzuki, M. Nakase, S. Ito, Y. Inaba, T. Matsumura and K. Takeshita, Effects of Diluents on the Separation of Minor Actinides from Lanthanides with Tetradodecyl-1,10-phenanthroline-2,9-diamide from Nitric Acid Medium, *Anal. Sci.*, 2020, **36**, 241-245.
